# Supplementary material for: Excitation Light Dose Engineering to Reduce Photo-bleaching and Photo-toxicity
Source: PubMed Central journal article supplement (PMC4971503; doi:10.1038/srep30892), 2016-08-03
Supplement: srep30892-s1.pdf [file srep30892-s1.pdf]

# **EXCITATION LIGHT DOSE ENGINEERING TO REDUCE PHOTO-BLEACHING AND PHOTO-TOXICITY**

Colton Boudreau<sup>1,\*</sup>, Tse-Luen (Erika) Wee<sup>1,2,\*</sup>, Yan-Rung (Silvia) Duh<sup>3</sup>, Melissa P. Couto<sup>3</sup>,  
Kimya H. Ardakani<sup>4</sup>, and Claire M. Brown<sup>1,2,¥</sup>

- 1) Department of Physiology, McGill University
- 2) Advanced BioImaging Facility (ABIF), McGill University, 3649 Prom. Sir William Osler, Bellini Building Rm137, Montreal, QC, Canada, H3G 0B1
- 3) Department of Anatomy and Cell Biology, McGill University
- 4) Department of Microbiology and Immunology, McGill University

\* Equal contribution by both authors.

¥ Corresponding Author: [claire.brown@mcgill.ca](mailto:claire.brown@mcgill.ca)

**Supplemental Figure 1: Photo-bleaching of EGFP in the presence or absence of oxygen:** Normalized CLSM photo-bleaching decay rates for paxillin-EGFP with one slow scan or 16-scan rapid scans in the presence of oxygen or with the oxygen scavenger OxyFluor™. T-tests were conducted and three \*\*\* corresponds to  $P < 0.001$ . There was no significant difference between the decay rates for 1 scan and 16 scans in the presence of OxyFluor™. Error bars are SEM.

**Supplemental Figure 2: Rapid line scanning reduces photo-bleaching:** Fixed CHO-K1 cells expressing paxillin-mCherry imaged with 25% power from the 543 nm laser on the CLSM with variable numbers of line scans. **A)** Photo-bleaching curves follow a double exponential decay when scanning each line once slowly but a single exponential decay with averaging 16 rapid scans. **B)** Normalized average photo-bleaching decay rates for experiments that were conducted in triplicate with 9 cells and 15 ROIs for each condition. P values were calculated using a t-test of means and \*\*\* corresponds to  $P < 0.001$ . Error bars are SEM.

**Supplemental Figure 3: Reduced photobleaching with spinning disk confocal:** Paxillin-EGFP in fixed CHO-K1 cells imaged **A)** with a 15 ms exposure time with wide-field laser illumination or **B)** with a 1000 ms exposure time with spinning disk confocal microscopy. **C)** Normalized photo-bleaching decay rates for fixed paxillin-EGFP with wide-field or spinning disk confocal excitation. The scale bars are 10  $\mu\text{m}$ . Error bars are SEM.

**Supplemental Figure 4: Photo-toxicity depends on EGFP fluorescence excitation and emission:** Plots showing **A)** Cell protrusion rates and **B)** cell retraction rates. CHO-K1 cells lacking any EGFP protein fusion were imaged in bright field transmitted light (BF), or with blue fluorescence excitation light (Blue Excitation), cells expressing paxillin-EGFP but imaged only in BF (EGFP-BF) or with fluorescence excitation (EGFP-Blue Excitation). Images were collected every 20 seconds for 30 minutes in order to measure protrusion and retraction rates. T-tests of means relative to BF imaging and  $P < 0.01$  is shown at \*\* while  $P < 0.0001$  is \*\*\*. Error bars are SEM.

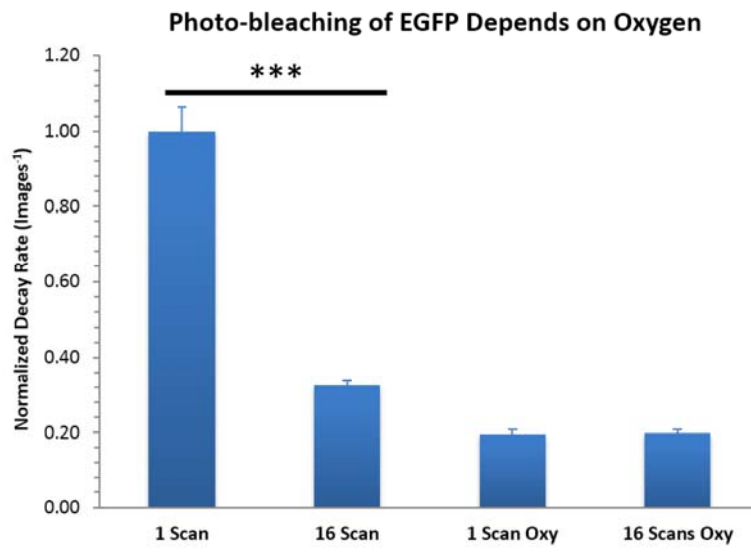

Supplemental Figure 1

A

### mCherry Photo-bleaching as a function of Number of Line Scans

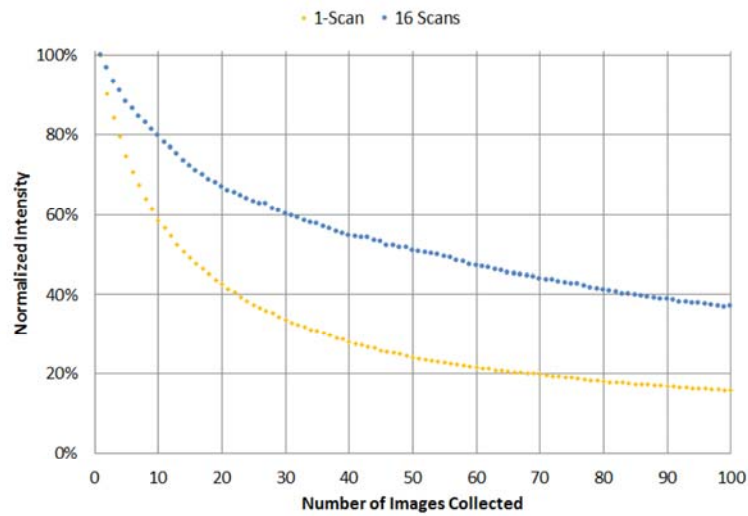

B

### mCherry Photo-bleaching (Case 3)

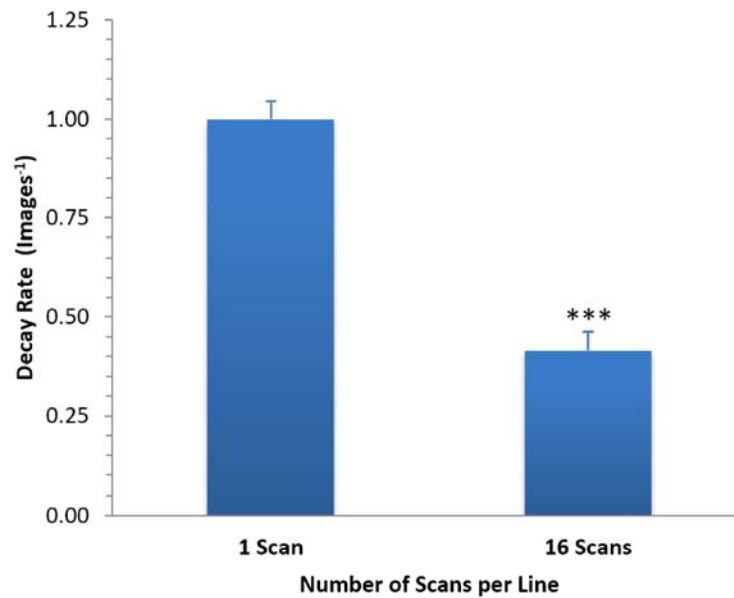

Supplemental Figure 2

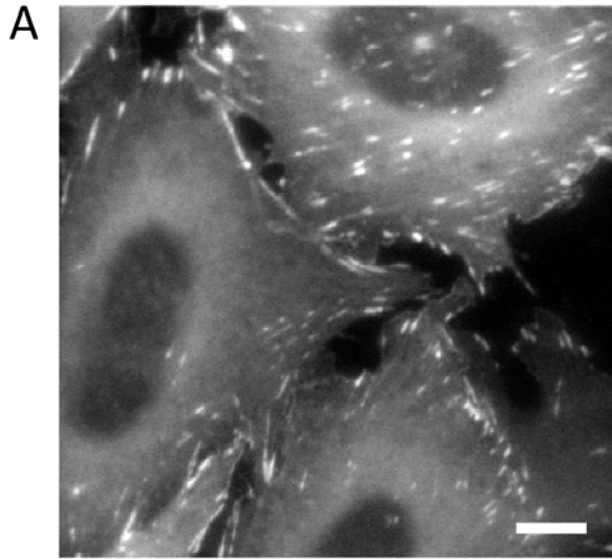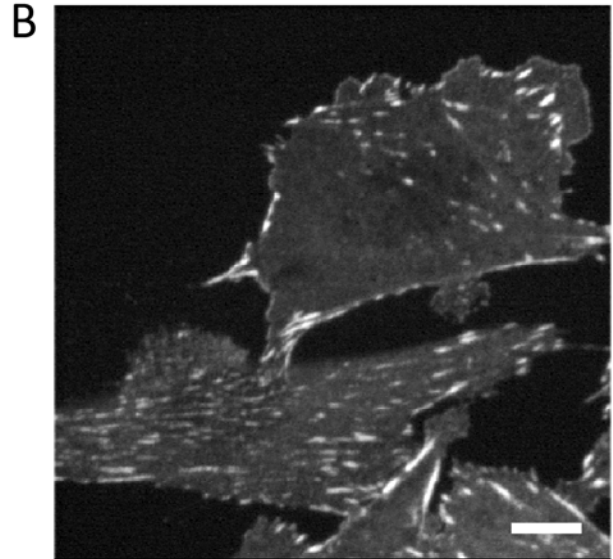

**C** Spinning Disk Shows Reduced Photo-bleaching of EGFP

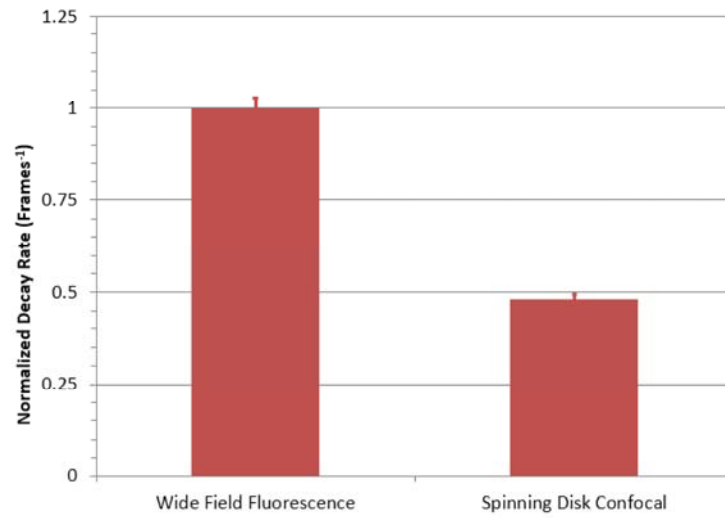

Supplemental Figure 3

**A**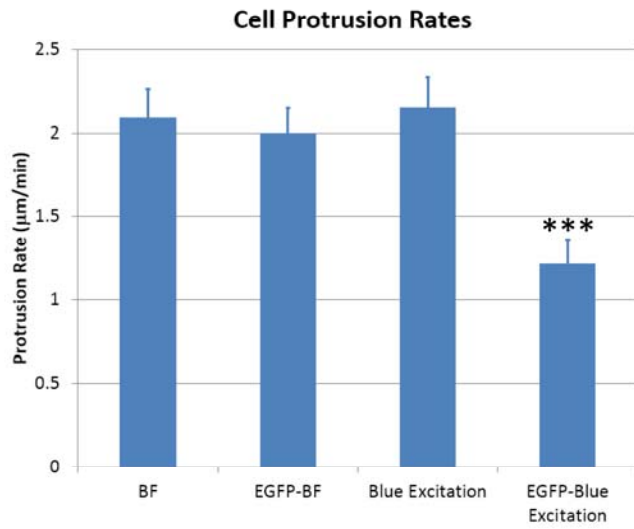**B**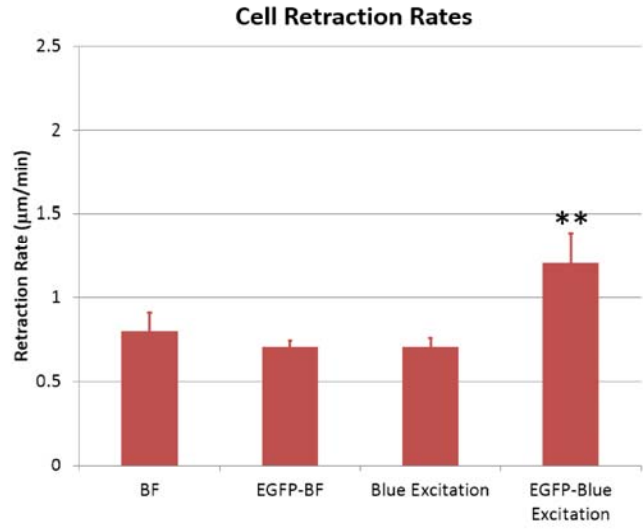

Supplemental Figure 4
